# Supplementary material for: Fenbendazole Exhibits Differential Anticancer Effects In Vitro and In Vivo in Models of Mouse Lymphoma
Source: MDPI journal article supplement (doi:10.3390/cimb45110560), 2023-11-08
Supplement: s1 [file s1]

(A)

7-10 weeks, FBZ 40 mg/kg

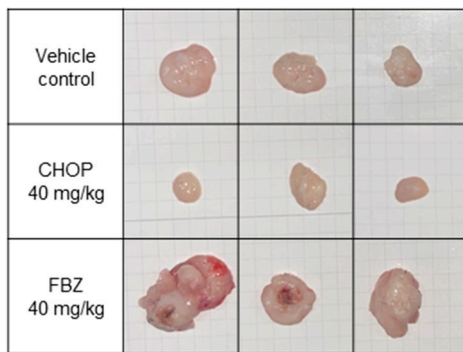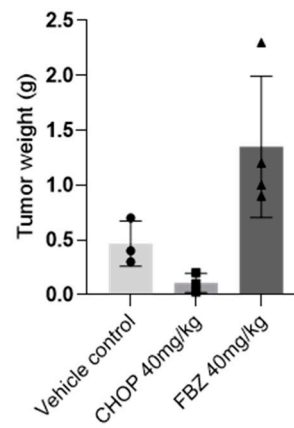

(B)

17-21 weeks, FBZ 25 mg/kg

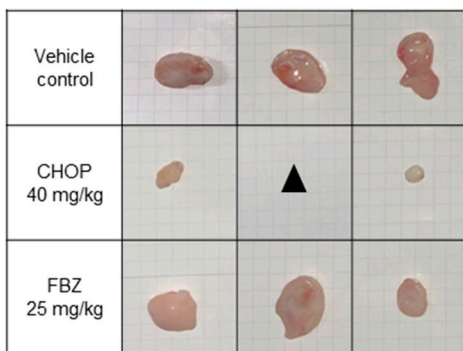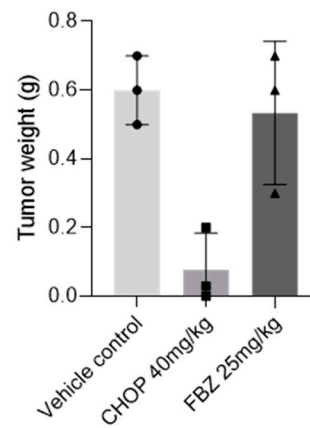

**Figure S1. FBZ does not have anticancer effects in two different experimental conditions in vivo.** Different doses of FBZ or different ages of mice were used to confirm that FBZ does not have anticancer effects: **(A)** 7–10-week-old C57BL/6 mice and 40 mg/kg FBZ. **(B)** 17–21-week-old C57BL/6 mice and 25 mg/kg FBZ. All drugs were injected IP, and the doses for vehicle control and CHOP-treated group are the same as described in 'Materials & Methods'. ▲: regression.
